# Supplementary material for: A general route to modify diatomite with niobates for versatile applications of heavy metal removal
Source: Royal Society of Chemistry journal article supplement (doi:10.1039/c8ra10186h), 2019-01-01
Supplement: c8ra10186h1.pdf [file c8ra10186h1.pdf]

## **Electronic Supplementary Information (ESI)**

### **A General Route to Modify Diatomite with Niobates for Versatile Applications of Heavy Metal Removal**

Tianning Wang, Yunfei Yang, Jinshu Wang\*, Junshu Wu\*, Lingmin Sun, Yucheng

Du, Yongli Li, Hongyi Li

The Key Lab of Advanced Functional Materials, Ministry of Education China,  
School of Materials Science and Engineering, Beijing University of Technology,  
Beijing 100022, China

\*Corresponding author, Tel./fax: +86 10 6739 1101

E-mail address: wangjsh@bjut.edu.cn, junshuwu@bjut.edu.cn

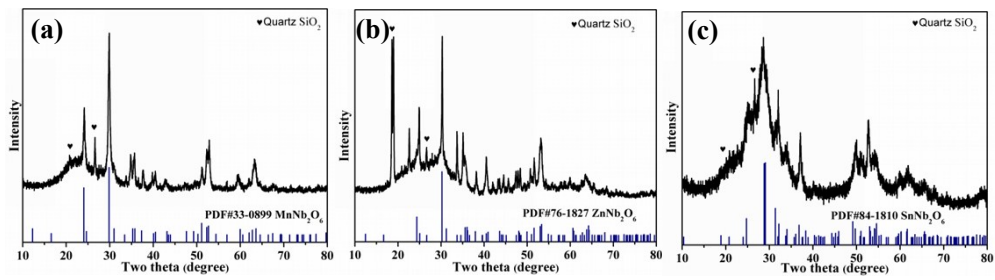

**Fig. S1.** XRD patterns of the as-prepared (a) MNOD, (b) ZNOD, and (c) SNOD.

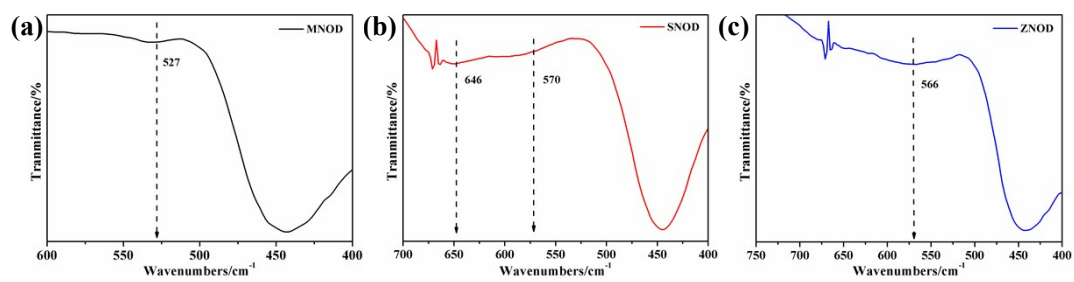

**Fig. S2.** The detail views of FT-IR spectra (a) MNOD, (b) SNOD, and (c) ZNOD.

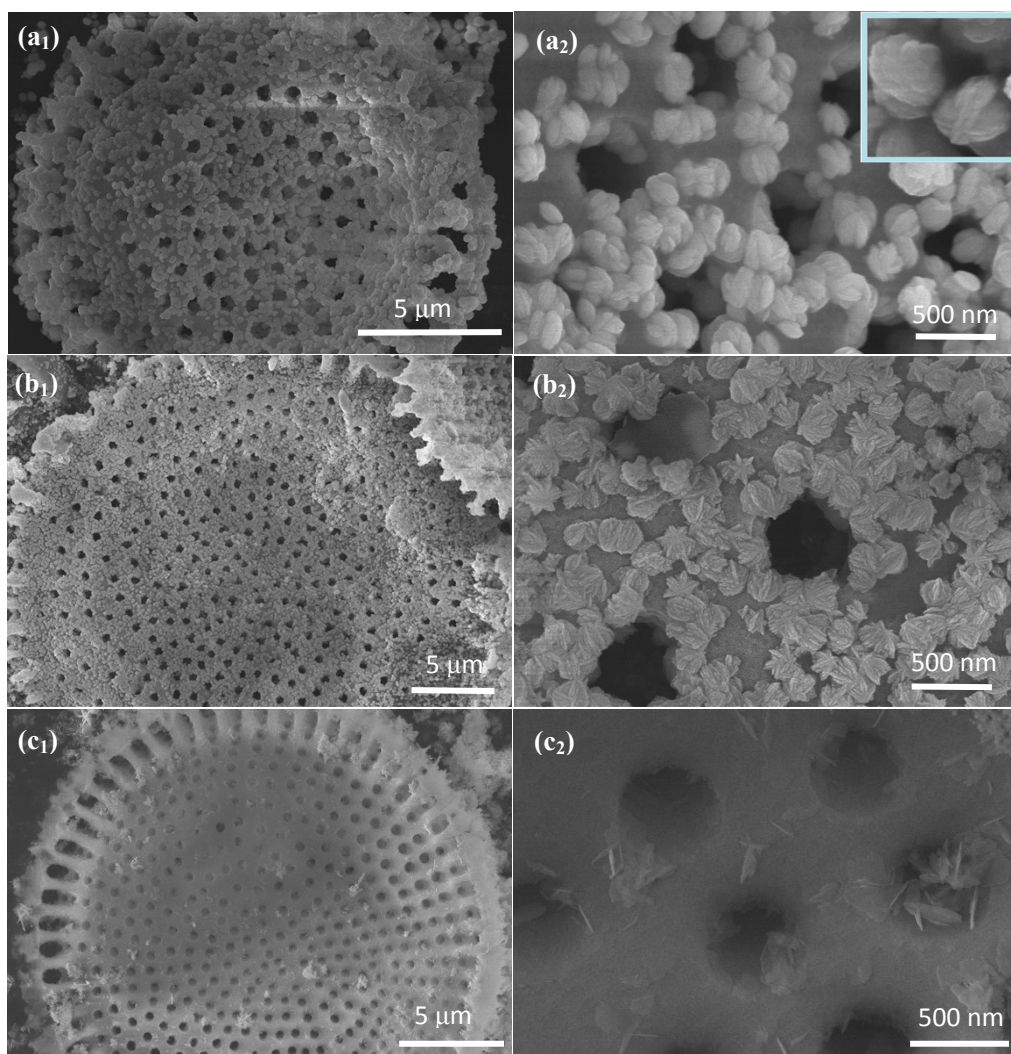

**Fig. S3.** SEM images of (a<sub>1</sub>-a<sub>2</sub>) MNOD, (b<sub>1</sub>-b<sub>2</sub>) ZNOD, and (c<sub>1</sub>-c<sub>2</sub>) SNOD

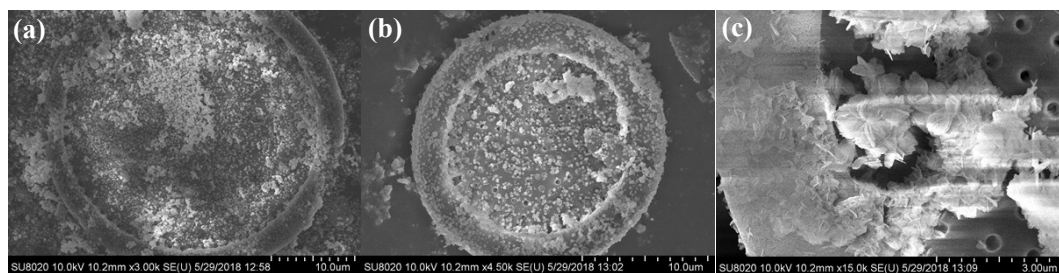

**Fig. S4.** SEM images of (a) MNOD, (b) SNOD and (c) ZNOD obtained by using RD.

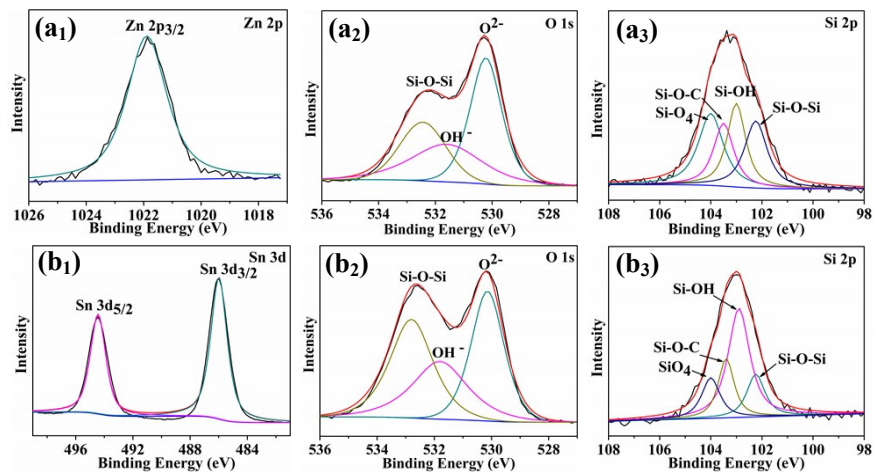

**Fig. S5.** (a<sub>1</sub>-a<sub>3</sub>) High resolution XPS scan of Zn 2p (a<sub>1</sub>), O 1s (a<sub>2</sub>), and Si 2p (a<sub>3</sub>) in ZNOD. (b<sub>1</sub>-b<sub>3</sub>) Sn 3d (b<sub>1</sub>), O 1s (b<sub>2</sub>), and Si 2p (b<sub>3</sub>) in SNOD.

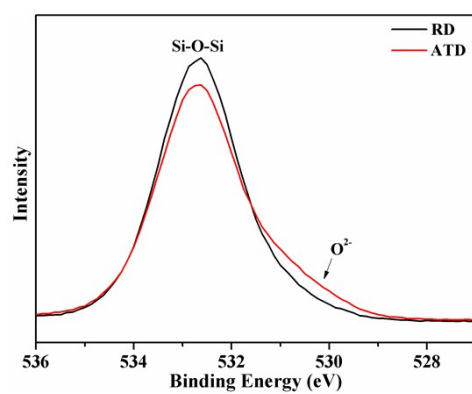

**Fig. S6.** High resolution XPS scan of O 1s of RD and ATD.

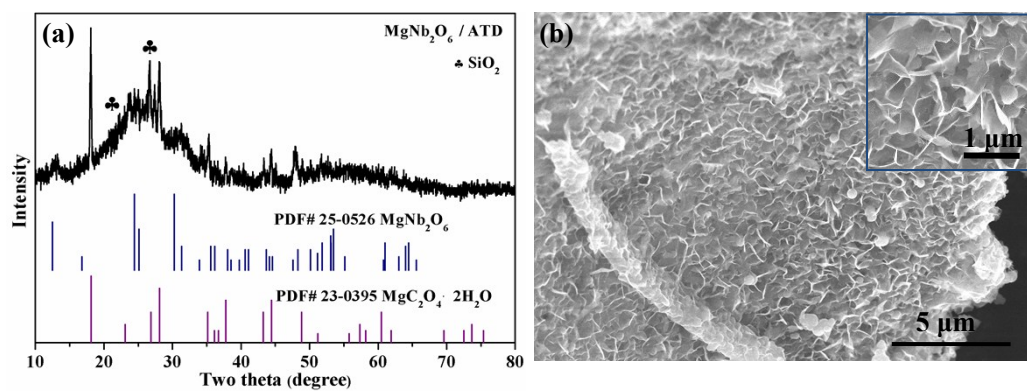

**Fig. S7.** (a) XRD pattern and (b) SEM images of the as-prepared  $\text{MgNb}_2\text{O}_6$  on ATD.



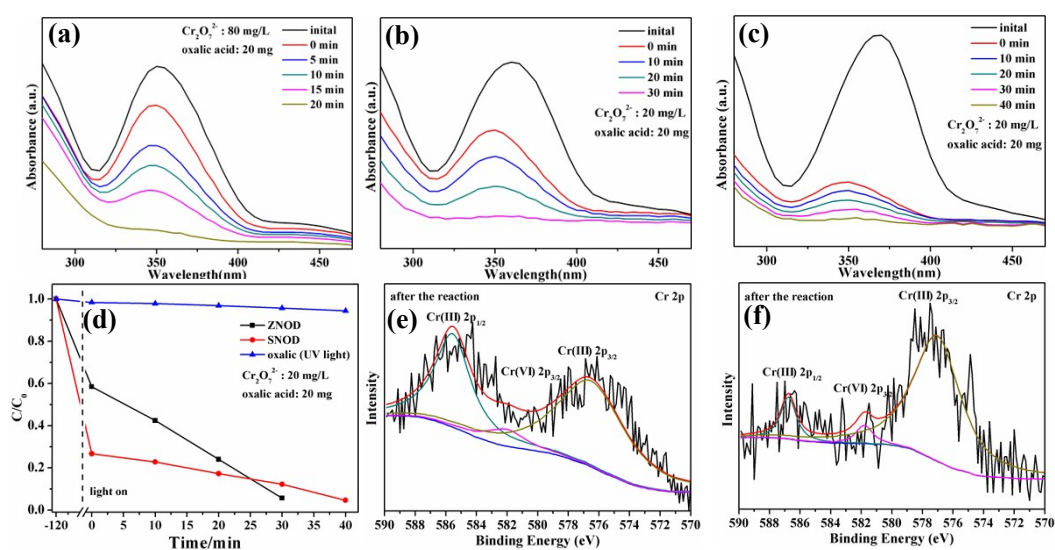

**Fig. S8.** (a) UV-vis spectra of  $\text{Cr}_2\text{O}_7^{2-}$  solution as a function of time using MNOD (20 mg) under natural light irradiation. (b, c) UV-vis spectra of  $\text{Cr}_2\text{O}_7^{2-}$  solution treated with (b) ZNOD (20 mg) and (c) SNOD (20 mg) under 300 W xenon lamp with an ultraviolet cutoff filter ( $\lambda > 420$  nm) and with a visible-light cutoff filter ( $\lambda < 400$  nm), respectively. (d) Comparison of photoreduction performances of ZNOD (UV light), and SNOD (visible light). (e, f) High resolution XPS scan of Cr 2p in (e) SNOD and (f) ZNOD after photoreduction.

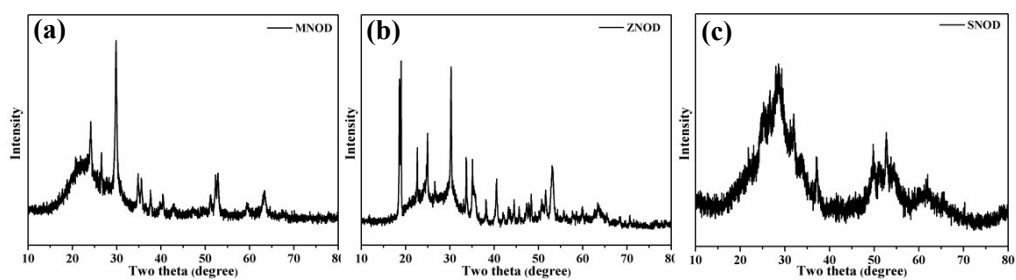

**Fig. S9.** XRD patterns of (a) MNOD, (b) ZNOD, and (c) SNOD after photoreduction.

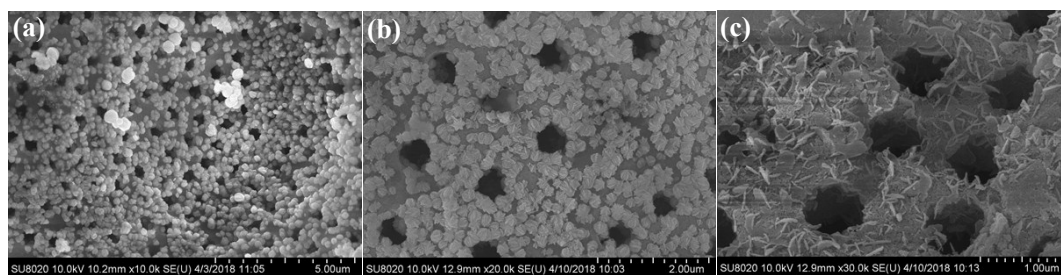

**Fig. S10.** SEM images of (a) MNOD, (b) ZNOD and (c) SNOD after photoreduction.

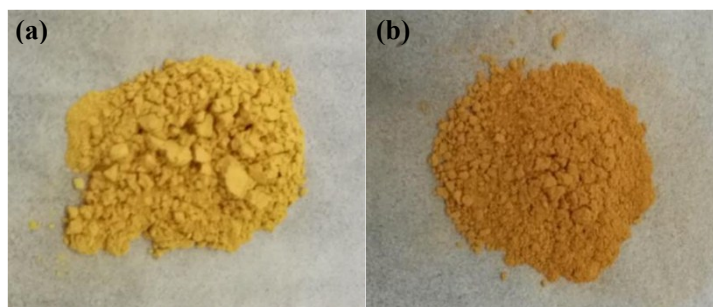

**Fig. S11.** Optical photographs of MNOD (a) before and (b) after the adsorption of  $\text{Fe(OH)}_3$  colloids.

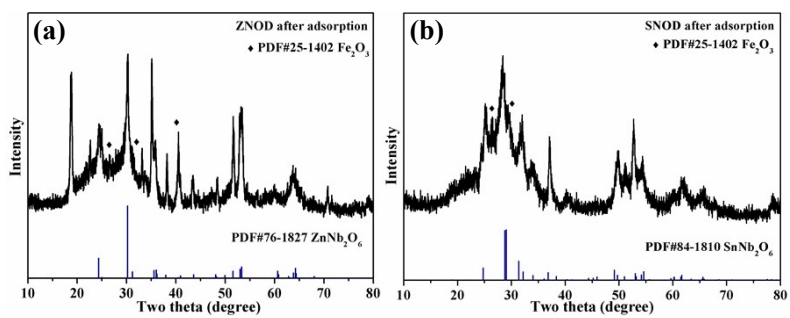

**Fig. S12.** XRD patterns of (a) SNOD and (b) ZNOD after Fe(OH)<sub>3</sub> colloid adsorption.

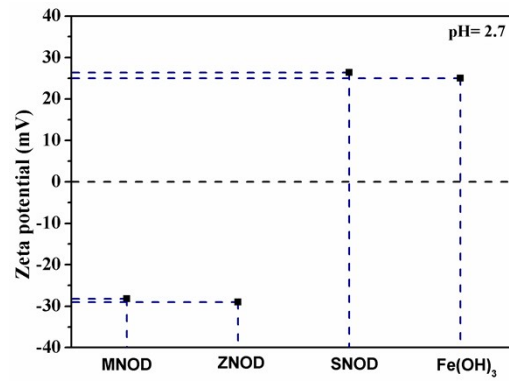

**Fig. S13.** Zeta potential of MNOD, ZNOD, SNOD and Fe(OH)<sub>3</sub> colloid in aqueous solution with pH= 2.7.

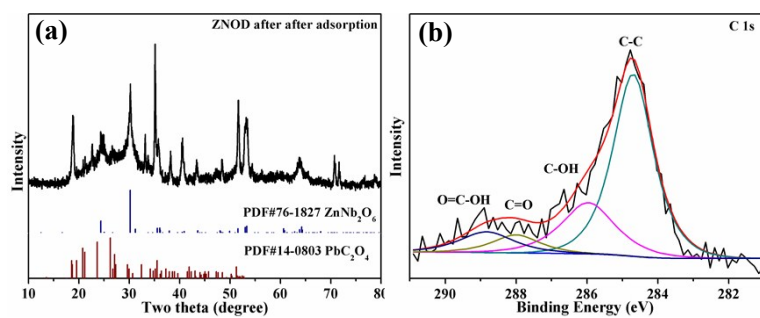

**Fig. S14.** (a) XRD pattern of ZNOD after Pb(II) adsorption, and (b) C 1s high resolution XPS scan of ZNOD.

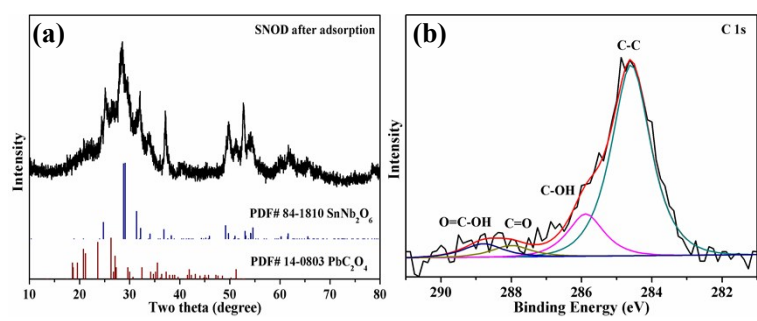

**Fig. S15.** (a) XRD pattern of SNOD after Pb(II) adsorption, and (b) C 1s high resolution XPS scan of SNOD.



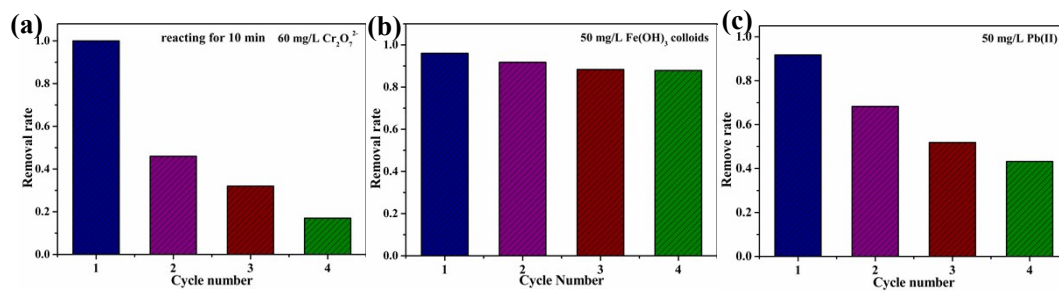

**Fig. S16.** (a-c) The reusability of MNOD over four cycles for (a) photoreduction of Cr(VI), (b) adsorption of Fe(OH)<sub>3</sub> colloids and (c) adsorption of Pb(II) ions.
